# Supplementary material for: Syntheses of 7-dehydrocholesterol peroxides and their improved anticancer activity and selectivity over ergosterol peroxide
Source: Royal Society of Chemistry journal article supplement (doi:10.1039/c7nj04100d), 2017-01-01
Supplement: c7nj04100d1.pdf [file c7nj04100d1.pdf]

## Supporting Information

### Syntheses of 7-dehydrocholesterol peroxides and their improved anticancer activity and selectivity over ergosterol peroxide

Na-na Tian,<sup>a,b</sup> Chao Li,<sup>\*,a</sup> Na Tian,<sup>a,b</sup> Qian-xiong Zhou,<sup>a</sup> Yuan-jun Hou,<sup>a</sup> Bao-wen Zhang,<sup>a</sup> and Xue-song Wang<sup>\*,a,b</sup>

<sup>a</sup>*Key Laboratory of Photochemical Conversion and Optoelectronic Materials, Technical Institute of Physics and Chemistry Chinese Academy of Sciences, Beijing 100190, P.R. China*

<sup>b</sup>*University of Chinese Academy of Sciences, Beijing 100049, P. R. China*

## Experimental section

### Materials.

7-Dehydrocholesterol (7-DHC) was provided by Vidistone Chemical Company. Ergosterol, succinic anhydride, acetic anhydride, hematoporphyrin, eosin Y, methylene blue and *meso*-tetraphenylporphyrin (TPP) were purchased from Sigma-Aldrich. *n*-Hexane, methanol, benzene, CH<sub>2</sub>Cl<sub>2</sub> and pyridine of analytical grade were purchased from SCRC (Sinopharm Chemical Reagent Co., Ltd) and used without further treatment.

### Instruments and methods.

<sup>1</sup>H NMR, <sup>13</sup>C NMR, HMBC and COSY spectra were recorded on a Bruker DMX-400 MHz and 100 MHz spectrophotometer. High-resolution ESI mass spectra (HR ESI-MS) were determined on a Bruker APEX IV (7.0T) FT\_MS.

### Syntheses of 7-dehydrocholesteryl-3-*o*- $\beta$ -acetate (**2**) and 7-dehydrocholesteryl-3-*o*- $\beta$ -hemisuccinate (**3**).

7-dehydrocholesterol (1.00 g, 2.60 mmol) in 5 mL acetic anhydride (52 mmol) was stirred and refluxed for 0.5 h at 140°C. After removal of acetic anhydride in vacuo, 10 mL distilled water was added. The solid was filtered and washed with water and then purified on silica gel using *n*-hexane/ethyl acetate (15:1 in volume ratio) as eluent. The yield of 7-dehydrocholesteryl-3-*o*- $\beta$ -acetate (**2**) was 81%. 7-dehydrocholesteryl-3-*o*- $\beta$ -hemisuccinate (**3**) was prepared in a similar way in a yield of 73%.

### Cell culture.

Breast cancer cells SKOV-3, cervical carcinoma cells HeLa, lung cancer cells A549, prostatic carcinoma cells DU145 and human normal liver cells L-02 were provided by Cancer Institute, Chinese Academy of Medical Science. The cells were cultured in DMEM medium containing 10% FBS, 100U/mL penicillin/streptomycin at 37°C under a 5% CO<sub>2</sub> atmosphere, then plated at  $2 \times 10^5$  per well in 96 well plates and incubated for 24 h in 150  $\mu$ L DMEM medium in the same conditions.

### Cell cytotoxicity assay.

The cytotoxicity of **1-3**, **1'-3'** and EEP was evaluated by MTT assay. The cells were plated at  $2 \times 10^5$  per well in 96 well plates. After incubation for 24 h, the cells were treated with varied concentrations of the examined compounds for 48 h at 37°C. The culture medium was removed and 200  $\mu$ L MTT (3-(4,5-dimethylthiazol-2-yl)-2,5-diphenyltetrazoliumbromide) solution was added and the cells were maintained at 37°C for 4 h. Then a mixed solution of CH<sub>3</sub>OH/DMSO (1:1) was added and the absorbance at 595 nm was determined by a Multimode Plate Reader (EnSpire). The untreated cells served as the control and their viability was set as 100%.

**Table S1.** Reaction optimization for the synthesis of EEP, **2'** and **3'**.<sup>a</sup>

| Entry | Substrate  | Product | Catalyst (mol%) | solvent                             | t <sup>b</sup> (h) | Yield <sup>c</sup> (%) |
|-------|------------|---------|-----------------|-------------------------------------|--------------------|------------------------|
| 1     | ergosterol | EEP     | TPP (0.1)       | pyridine                            | 1                  | 58                     |
| 2     | ergosterol | EEP     | TPP (0.1)       | benzene                             | 1                  | 53                     |
| 3     | ergosterol | EEP     | TPP (0.1)       | CH <sub>2</sub> Cl <sub>2</sub>     | 3                  | 44                     |
| 4     | ergosterol | EEP     | TPP (0.1)       | <i>n</i> -hexane/<br>methanol (3:1) | 1                  | 67                     |
| 5     | 2          | 2'      | TPP (0.1)       | <i>n</i> -hexane/<br>methanol (3:1) | 3                  | 78                     |
| 6     | 3          | 3'      | TPP (0.1)       | <i>n</i> -hexane/<br>methanol (3:1) | 3                  | 81                     |

<sup>a</sup> Reaction conditions: 1.56 mmol substrate and 1.9 μM TPP in 20 mL of solvent was subjected to visible light irradiation (≥ 400 nm) at 0°C under magnetic stirring and bubbling with oxygen; <sup>b</sup> by which all substrate was consumed; <sup>c</sup> isolated yield.

**Table S2.** <sup>1</sup>H NMR chemical shifts of **2**, **3**, **1'**-**3'** and EEP.

| Position | <sup>1</sup> H (δ, ppm) (in CDCl <sub>3</sub> ) |                              |                                 |                          |                         |                         |
|----------|-------------------------------------------------|------------------------------|---------------------------------|--------------------------|-------------------------|-------------------------|
|          | <b>2</b>                                        | <b>3</b>                     | EEP                             | <b>1'</b>                | <b>2'</b>               | <b>3'</b>               |
| H-3      | 4.70( m,1H )                                    | 4.73( m,1H)                  | 3.92(m, 1H)                     | 3.97(m, 1H)              | 4.98(m, 1H)             | 5.02(m, 1H)             |
| H-6      | 5.56( dd, 1H,<br>2.4, 5.6Hz)                    | 5.56( dd, 1H,<br>2.4, 4.8Hz) | 6.47(d, 1H,<br>8.4 Hz)          | 6.51(d, 1H,<br>8.4 Hz)   | 6.51(d, 1H, 8.4<br>Hz)  | 6.51(d, 1H, 8.4<br>Hz)  |
| H-7      | 5.38( dd, 1H,<br>2.4, 5.6Hz)                    | 5.38( dd, 1H,<br>2.4, 4.8Hz) | 6.21(d, 1H,<br>8.4 Hz)          | 6.24(d, 1H,<br>8.4 Hz)   | 6.23(d, 1H, 8.4<br>Hz)  | 6.22(d, 1H, 8.4<br>Hz)  |
| H-18     | 0.61(s, 3H)                                     | 0.61(s, 3H)                  | 0.81(s, 3H)                     | 0.80(s, 3H)              | 0.79(s, 3H)             | 0.80(s, 3H)             |
| H-19     | 0.93(s, 3H)                                     | 0.93(s, 3H)                  | 0.88(s, 3H)                     | 0.88(s, 3H)              | 0.89(s, 3H)             | 0.89(s, 3H)             |
| H-20     |                                                 |                              |                                 |                          |                         |                         |
| H-21     | 0.95(s, 3H)                                     | 0.95(s, 3H)                  | 1.00(d, 3H,<br>6.4 Hz )         | 0.90(d, 3H,<br>6.8 Hz,)  | 0.91(s, 3H)             | 0.91(s, 3H)             |
| H-22     |                                                 |                              | 5.14(dd, 1H,<br>15.2, 8.0 Hz, ) |                          |                         |                         |
| H-23     |                                                 |                              | 5.22(dd, 1H,<br>15.2, 7.6 Hz, ) |                          |                         |                         |
| H-26     | 0.86(d,3H,<br>1.6 Hz, )                         | 0.85(d,3H,<br>1.2 Hz, )      | 0.81(d, 3H,<br>6.4 Hz, )        | 0.85(d,3H,<br>1.6 Hz, )  | 0.85(d,3H,<br>1.6 Hz, ) | 0.85(d,3H,<br>2.0 Hz, ) |
| H-27     | 0.87(d,3H,<br>1.6 Hz, )                         | 0.87(d,3H,<br>1.2 Hz, )      |                                 | 0.87(d, 3H,<br>1.6 Hz, ) | 0.87(d, 3H, 1.6<br>Hz)  | 0.87(d,3H,<br>2.0 Hz, ) |
| H-28     |                                                 |                              |                                 |                          |                         |                         |
| H-1'     |                                                 |                              |                                 |                          |                         |                         |
| H-2'     | 2.04(s, 3H)                                     | 2.63(t, 2H,<br>4.8 Hz)       |                                 |                          | 2.01(s, 3H)             | 2.59(t, 2H, 6.4<br>Hz)  |
| H-3'     |                                                 | 2.67(t, 2H,<br>4.8 Hz)       |                                 |                          |                         | 2.68(t, 2H, 6.4,<br>Hz) |
| H-4'     |                                                 |                              |                                 |                          |                         |                         |

Atom numbering of **2'** and **3'** are as follows.

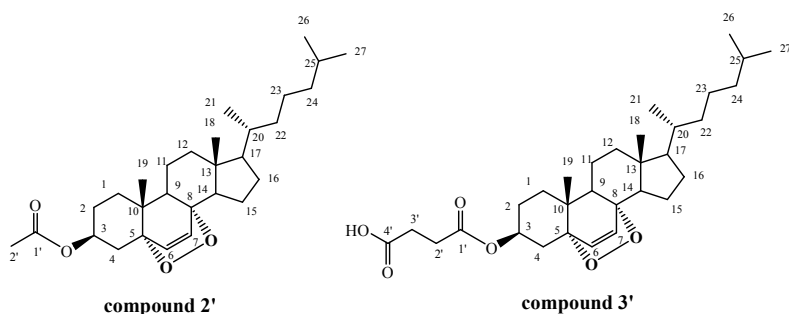

**Table S3.**  $^{13}\text{C}$  NMR chemical shifts of **2**, **3**, **1'-3'** and EEP.

| Position | $^{13}\text{C}$ ( $\delta$ , ppm) (in $\text{CDCl}_3$ ) |          |       |           |           |           |
|----------|---------------------------------------------------------|----------|-------|-----------|-----------|-----------|
|          | <b>2</b>                                                | <b>3</b> | EEP   | <b>1'</b> | <b>2'</b> | <b>3'</b> |
| C-1      | 28.1                                                    | 28.1     | 34.8  | 28.0      | 26.4      | 26.3      |
| C-2      | 36.3                                                    | 36.2     | 30.1  | 30.2      | 33.4      | 33.2      |
| C-3      | 72.9                                                    | 73.5     | 66.4  | 66.4      | 69.6      | 70.2      |
| C-4      | 38.1                                                    | 38.0     | 37.0  | 37.1      | 37.1      | 37.1      |
| C-5      | 138.7                                                   | 138.5    | 82.2  | 82.3      | 81.8      | 81.8      |
| C-6      | 120.4                                                   | 120.4    | 130.7 | 130.8     | 131.0     | 131.1     |
| C-7      | 116.4                                                   | 116.4    | 135.6 | 135.6     | 135.2     | 135.1     |
| C-8      | 141.7                                                   | 141.6    | 79.4  | 79.5      | 79.5      | 79.5      |
| C-9      | 46.2                                                    | 46.2     | 51.2  | 51.3      | 51.3      | 51.2      |
| C-10     | 37.3                                                    | 37.2     | 37.0  | 36.1      | 36.1      | 36.1      |
| C-11     | 23.2                                                    | 23.1     | 23.4  | 23.5      | 23.5      | 23.5      |
| C-12     | 39.7                                                    | 39.6     | 39.4  | 39.6      | 39.6      | 39.6      |
| C-13     | 43.1                                                    | 43.1     | 44.6  | 44.9      | 44.9      | 44.9      |
| C-14     | 54.6                                                    | 54.6     | 51.8  | 51.8      | 51.7      | 51.7      |
| C-15     | 21.2                                                    | 21.2     | 20.9  | 20.7      | 20.7      | 20.7      |
| C-16     | 28.3                                                    | 28.2     | 28.6  | 28.3      | 28.3      | 28.3      |
| C-17     | 56.1                                                    | 56.1     | 56.3  | 56.6      | 56.6      | 56.6      |
| C-18     | 11.9                                                    | 11.9     | 12.9  | 12.7      | 12.8      | 12.7      |
| C-19     | 16.3                                                    | 16.3     | 18.2  | 18.2      | 18.1      | 18.1      |
| C-20     | 39.4                                                    | 39.3     | 39.7  | 39.6      | 39.6      | 39.6      |
| C-21     | 19.0                                                    | 19.0     | 19.7  | 18.7      | 18.7      | 18.7      |
| C-22     | 36.3                                                    | 36.3     | 132.4 | 34.9      | 34.5      | 34.4      |
| C-23     | 24.0                                                    | 24.0     | 135.2 | 23.9      | 23.9      | 23.9      |
| C-24     | 36.8                                                    | 36.7     | 42.8  | 35.3      | 35.3      | 35.3      |
| C-25     | 28.2                                                    | 28.1     | 33.1  | 28.1      | 28.1      | 28.1      |
| C-26     | 22.6                                                    | 22.6     | 20.0  | 22.6      | 22.6      | 22.6      |
| C-27     | 22.9                                                    | 22.9     | 20.7  | 22.9      | 22.9      | 22.8      |
| C-28     |                                                         |          | 17.6  |           |           |           |
| C-1'     | 170.5                                                   | 171.584  |       |           | 170.0     | 171.2     |
| C-2'     | 21.4                                                    | 29.1     |       |           | 21.3      | 29.0      |
| C-3'     |                                                         | 29.4     |       |           |           | 29.3      |
| C-4'     |                                                         | 177.7    |       |           |           | 177.4     |

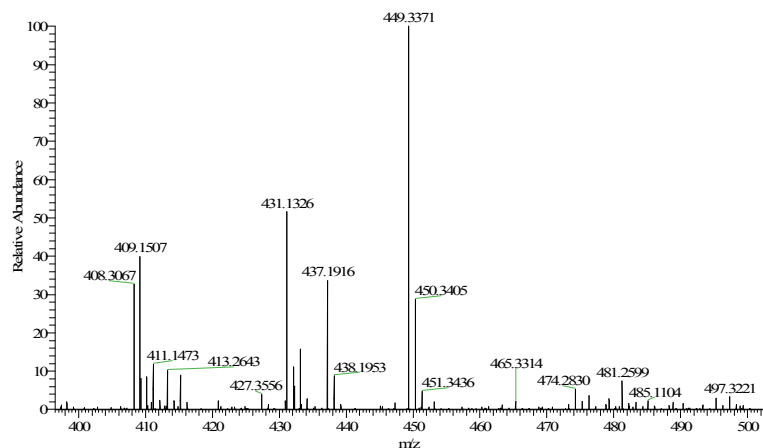

**Figure S1.** HR ESI-MS spectrum of 2.

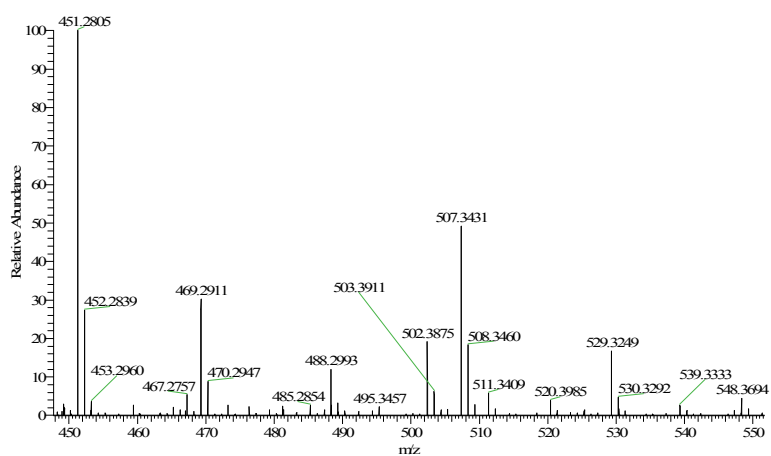

**Figure S2.** HR ESI-MS spectrum of 3.

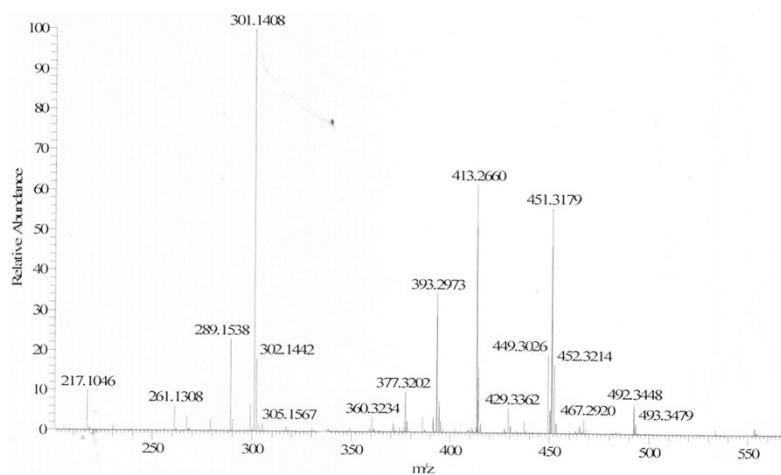

**Figure S3.** HR ESI-MS spectrum of EEP.

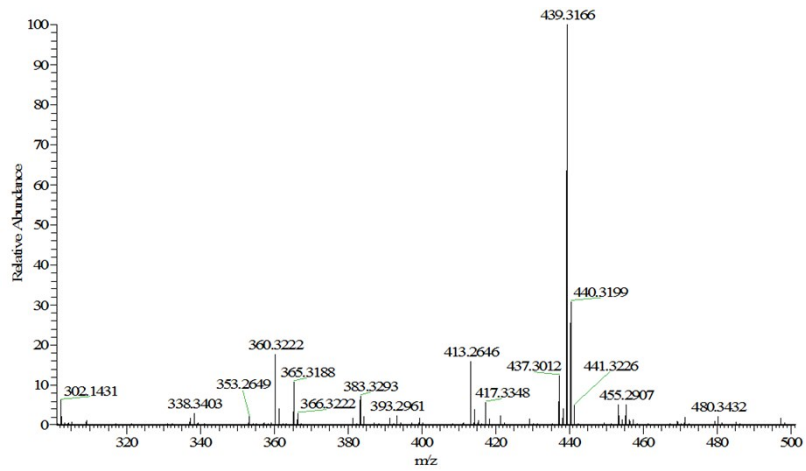

**Figure S4.** HR ESI-MS spectrum of CEP (1').

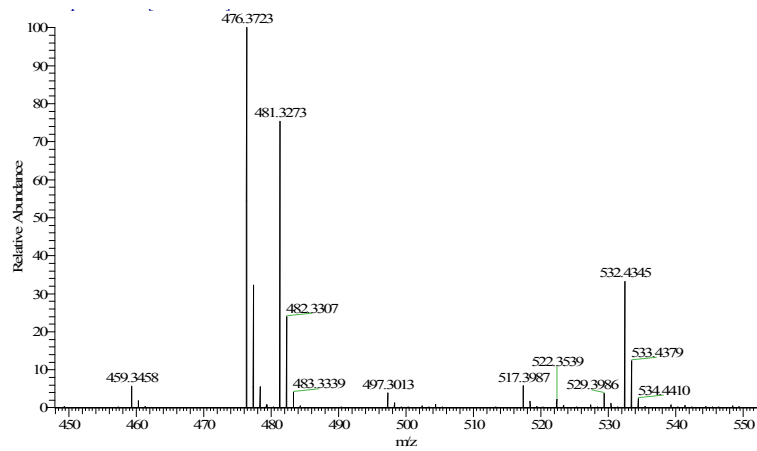

**Figure S5.** HR ESI-MS spectrum of 2'.

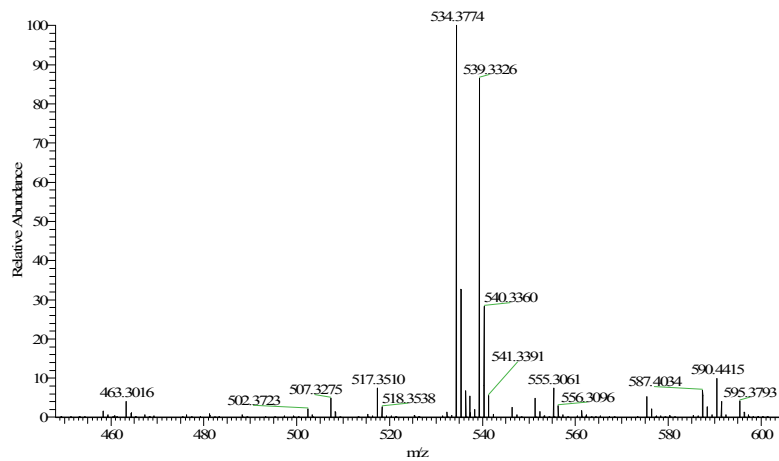

**Figure S6.** HR ESI-MS spectrum of 3'.

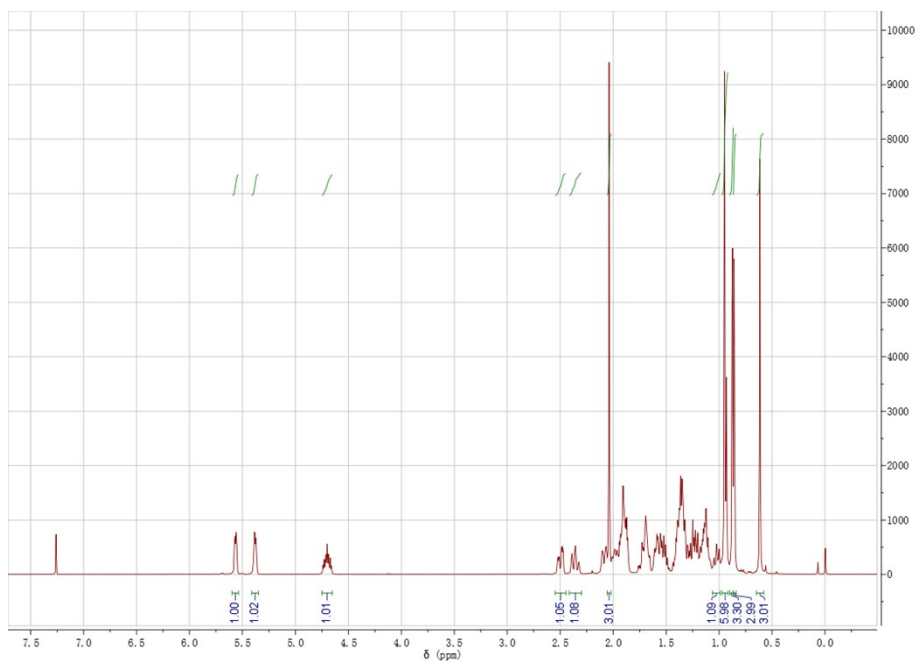

**Figure S7.**  $^1\text{H}$  NMR spectrum of **2**.

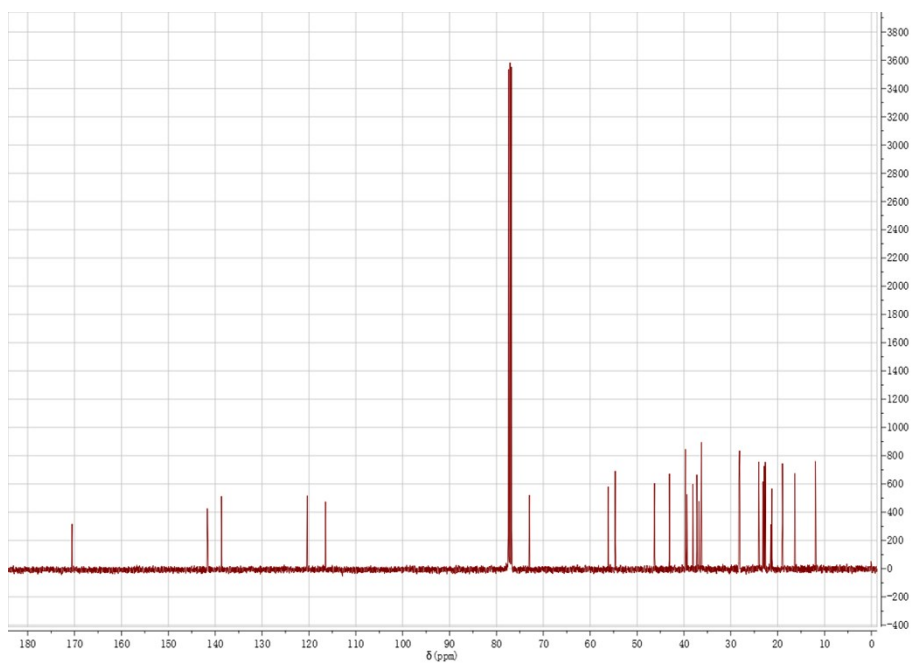

**Figure S8.**  $^{13}\text{C}$  NMR spectrum of **2**.



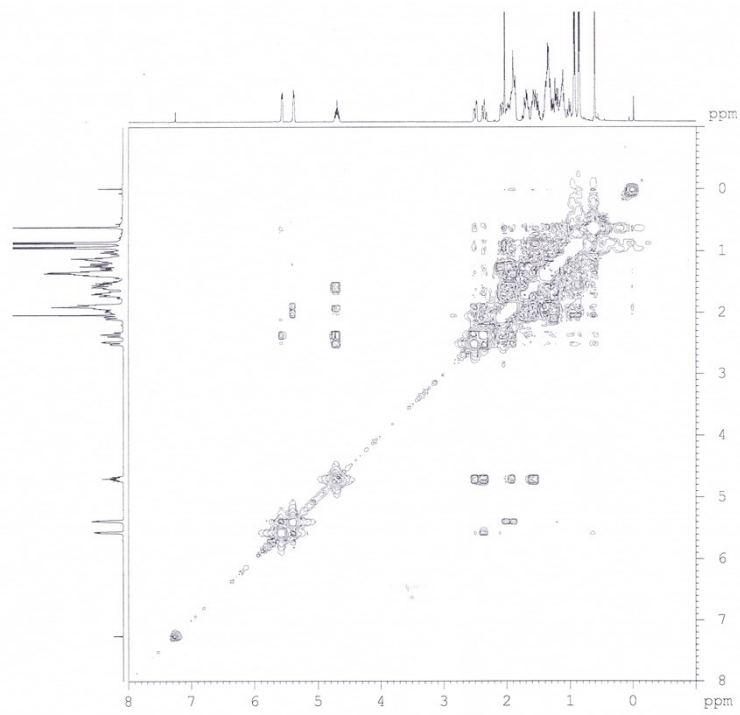

**Figure S9.** COSY spectrum of **2**.

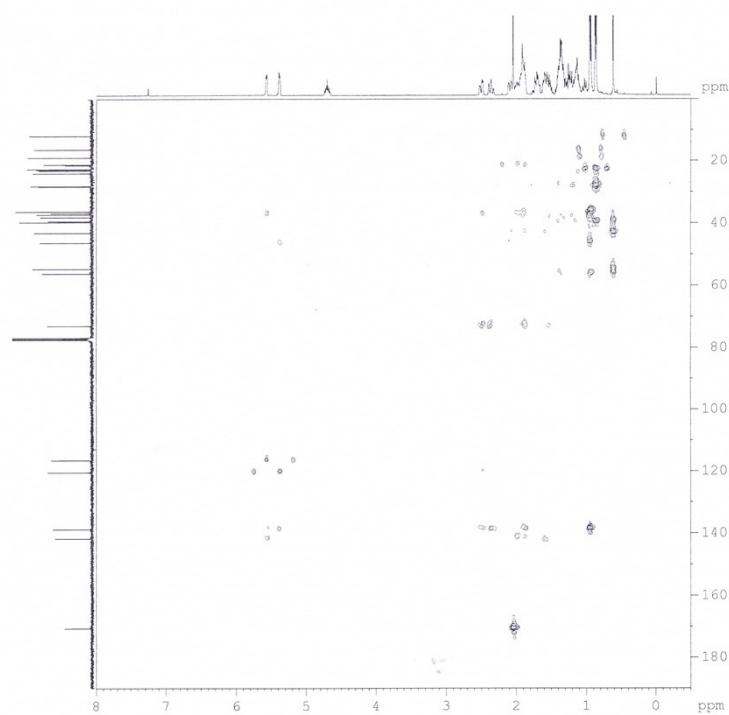

**Figure S10.** HMBC spectrum of **2**.

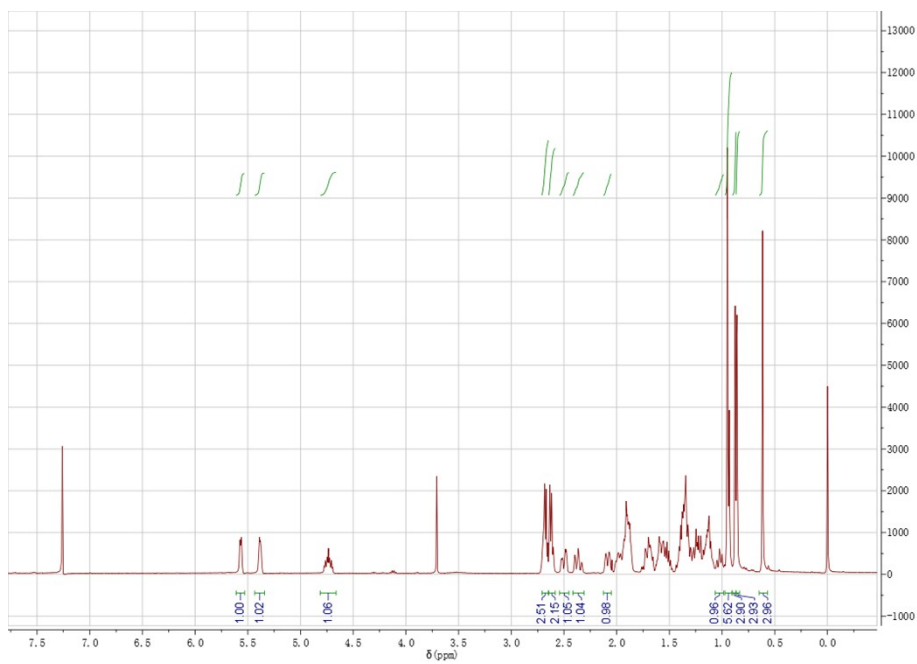

**Figure S11.**  $^1\text{H}$  NMR spectrum of **3**.

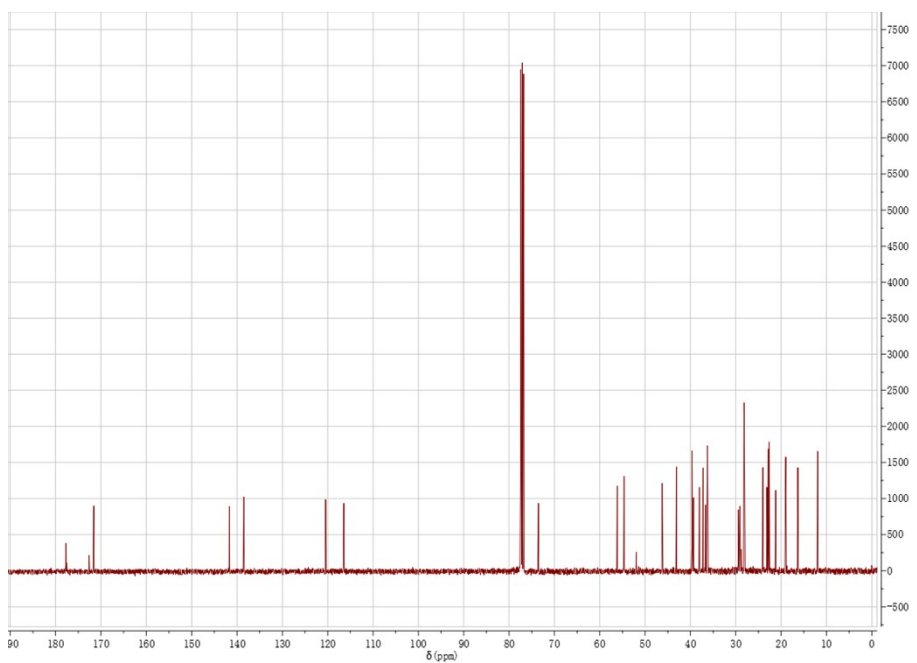

**Figure S12.**  $^{13}\text{C}$  NMR spectrum of **3**.

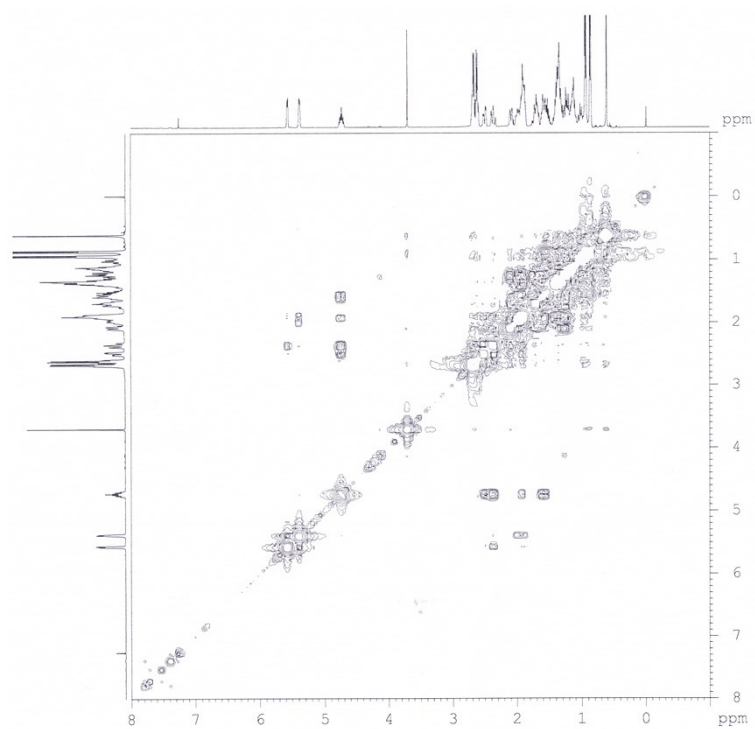

**Figure S13.** COSY spectrum of **3**.

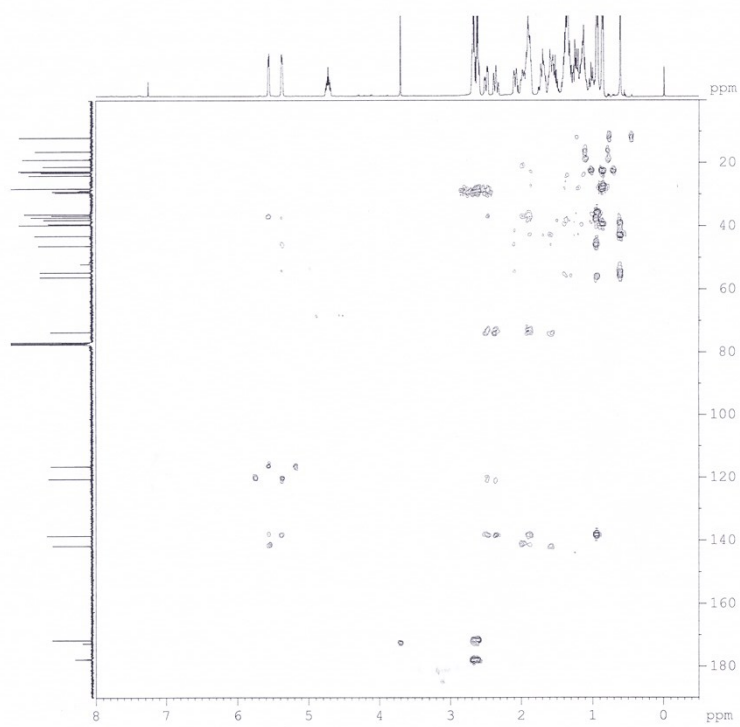

**Figure S14.** HMBC spectrum of **3**.

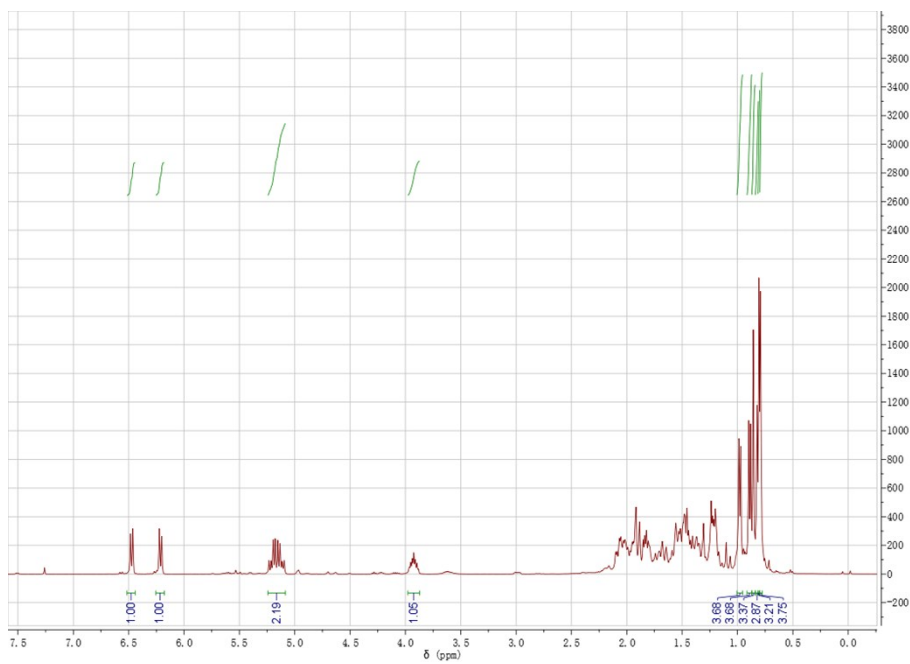

**Figure S15.** <sup>1</sup>H NMR spectrum of EEP.

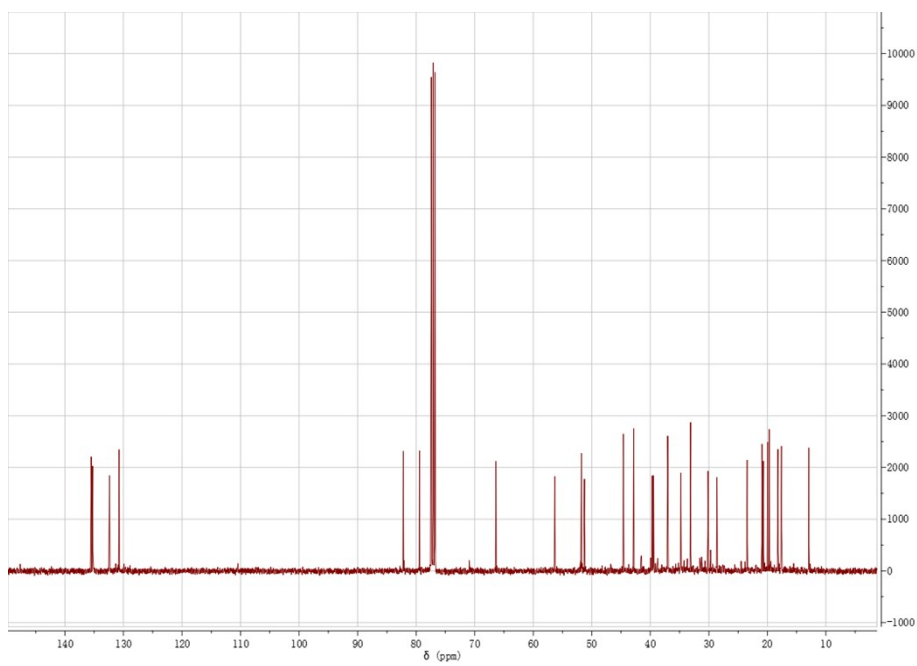

**Figure S16.** <sup>13</sup>C NMR spectrum of EEP.

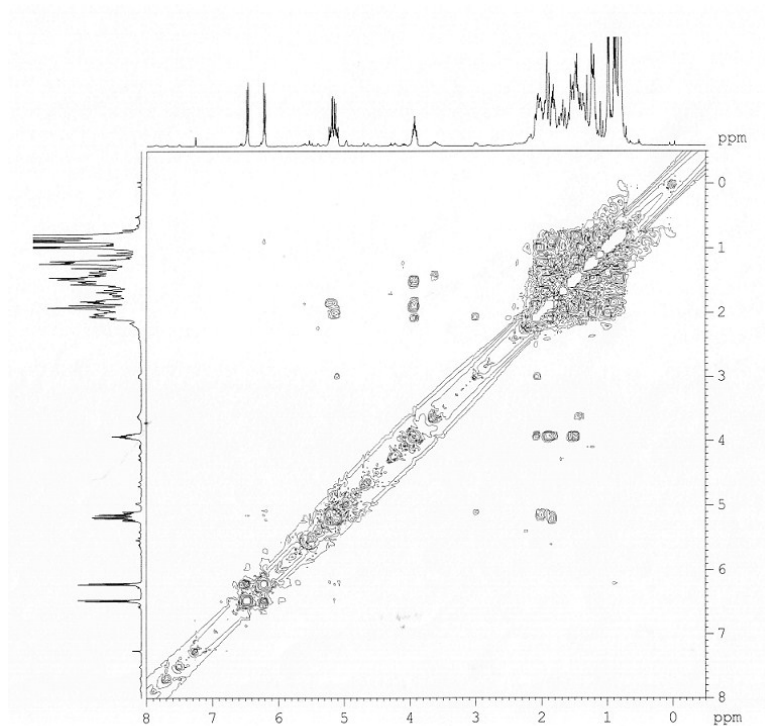

**Figure S17.** COSY spectrum of EEP.

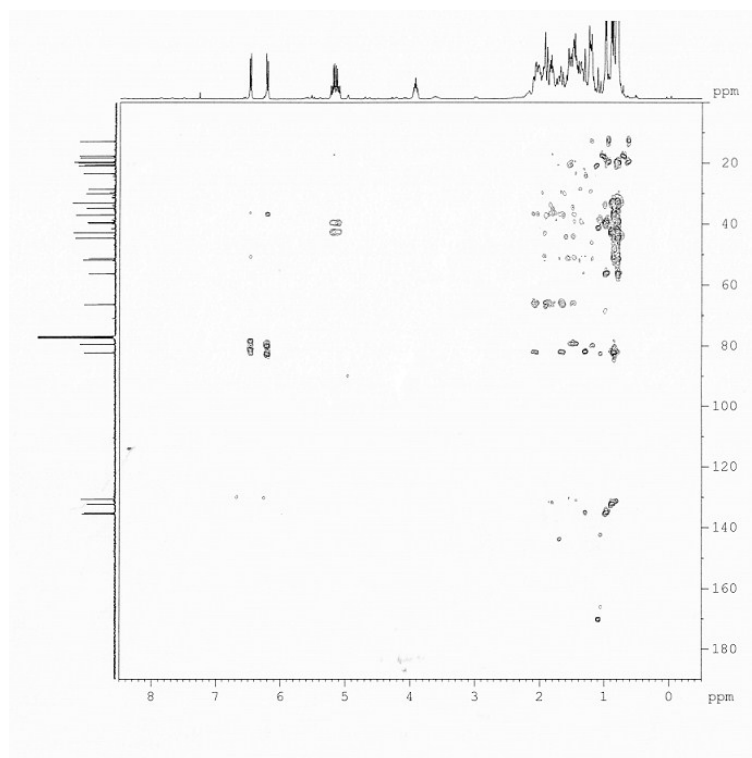

**Figure S18.** HMBC spectrum of EEP.

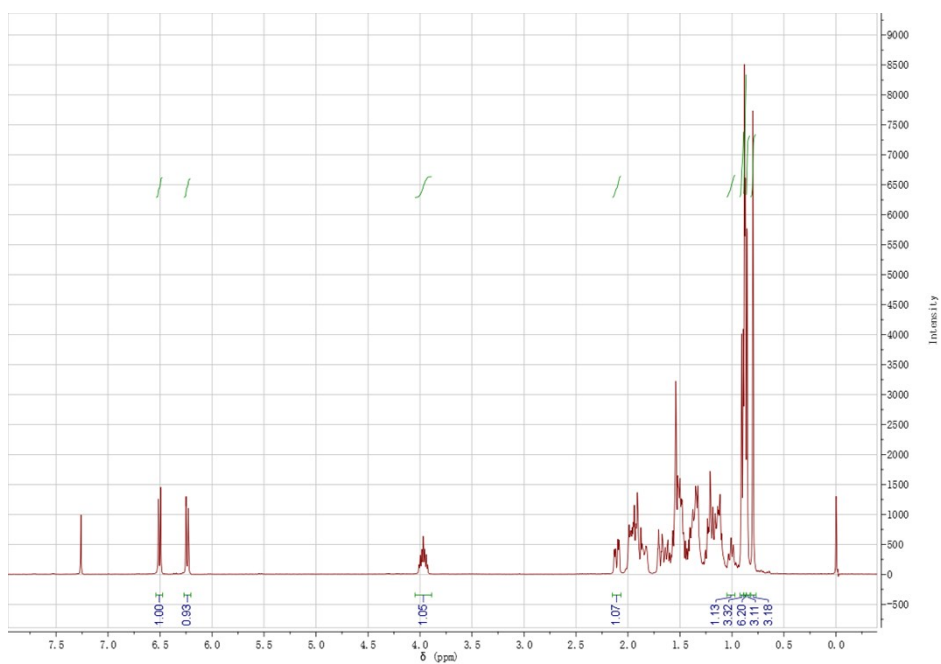

Figure S19. <sup>1</sup>H NMR spectrum of 1'.

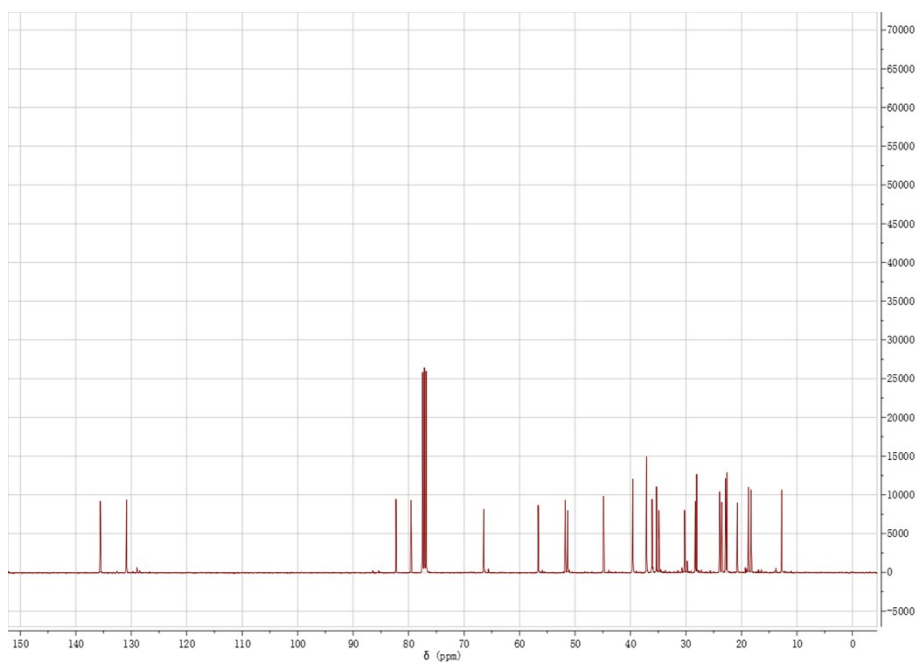

Figure S20. <sup>13</sup>C NMR spectrum of 1'.

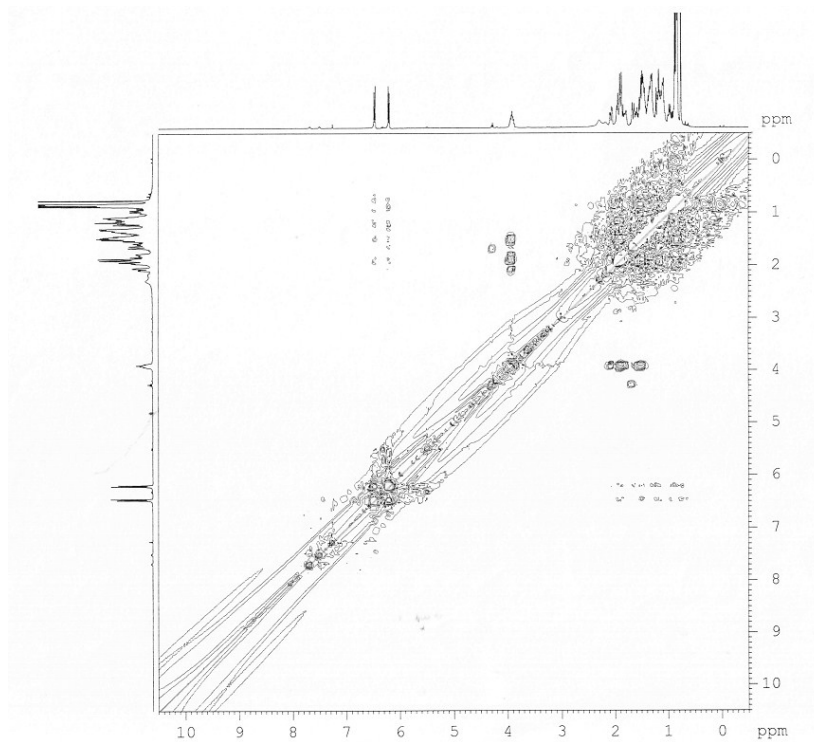

**Figure S21.** COSY spectrum of 1'.

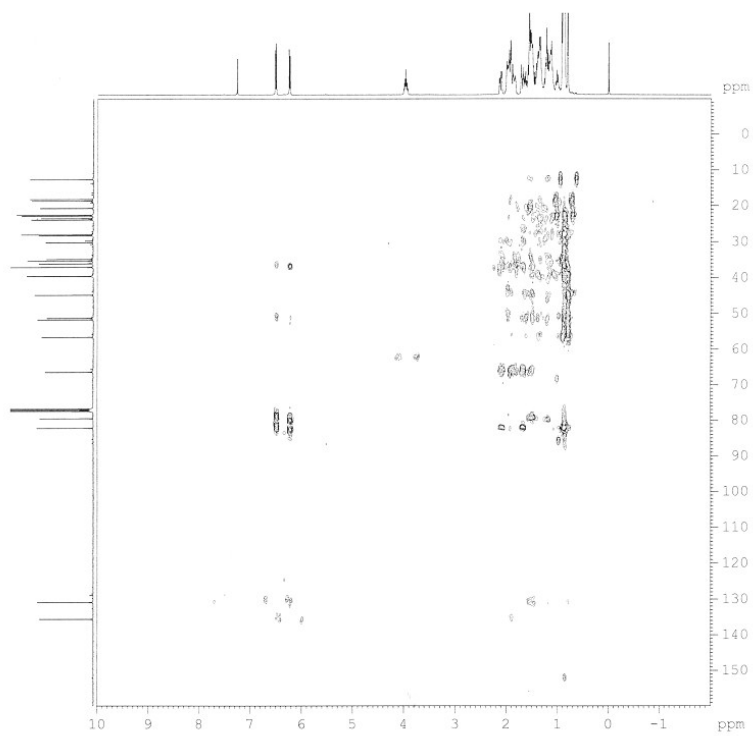

**Figure S22.** HMBC spectrum of 1'.

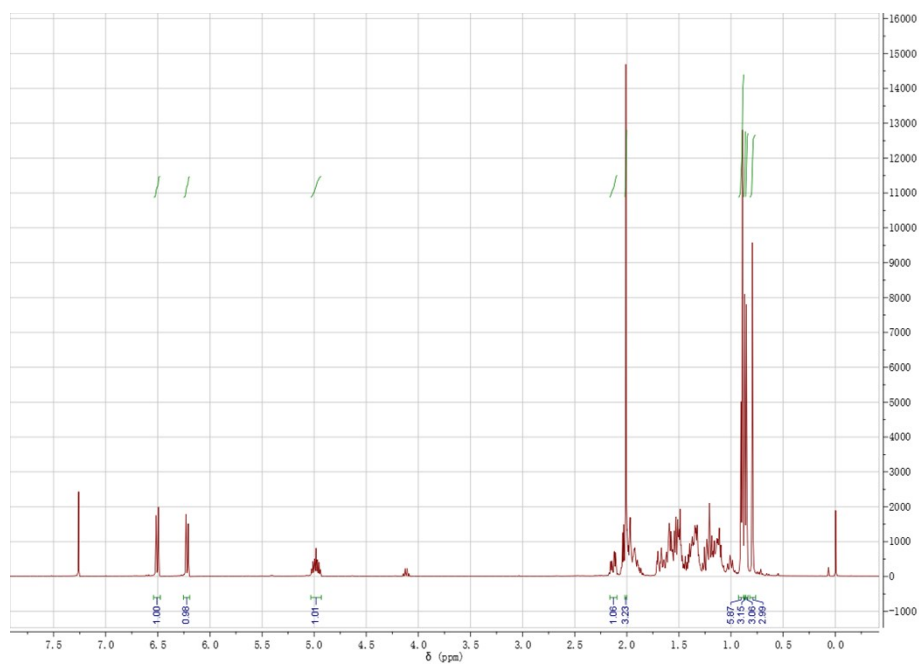

**Figure S23.**  $^1\text{H}$  NMR spectrum of **2'**.

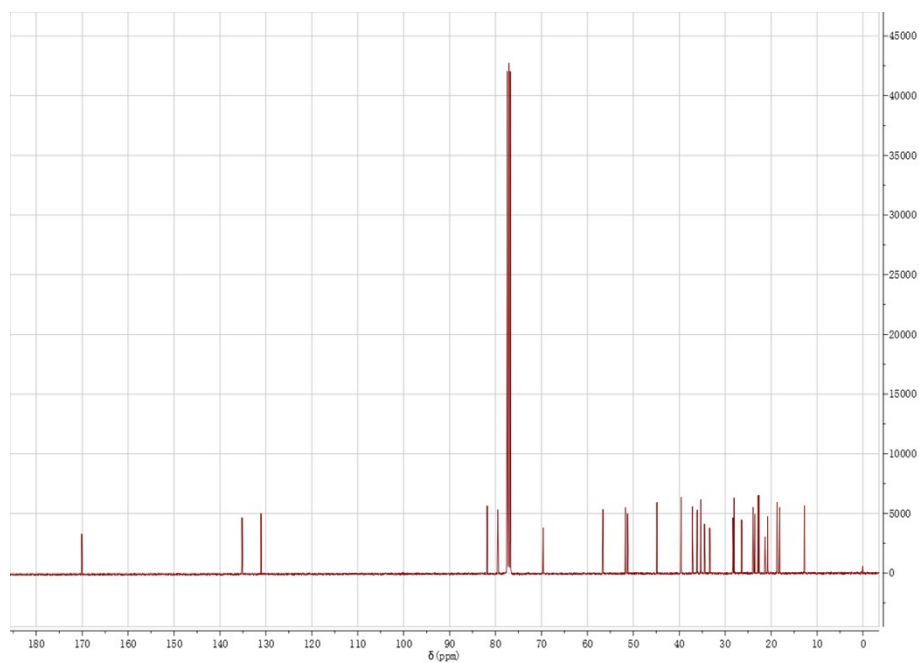

**Figure S24.**  $^{13}\text{C}$  NMR spectrum of **2'**.



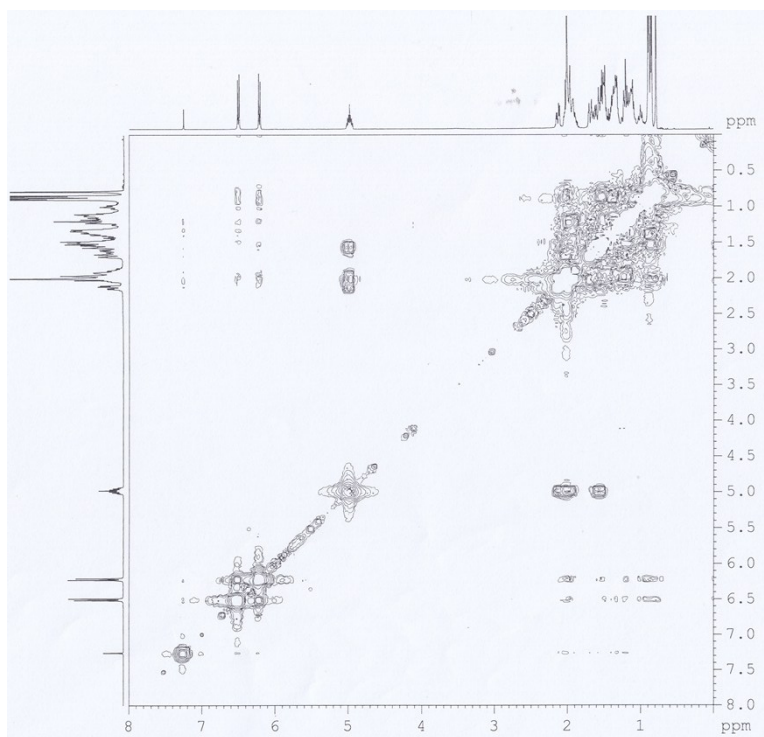

**Figure S25.** COSY spectrum of 2'.

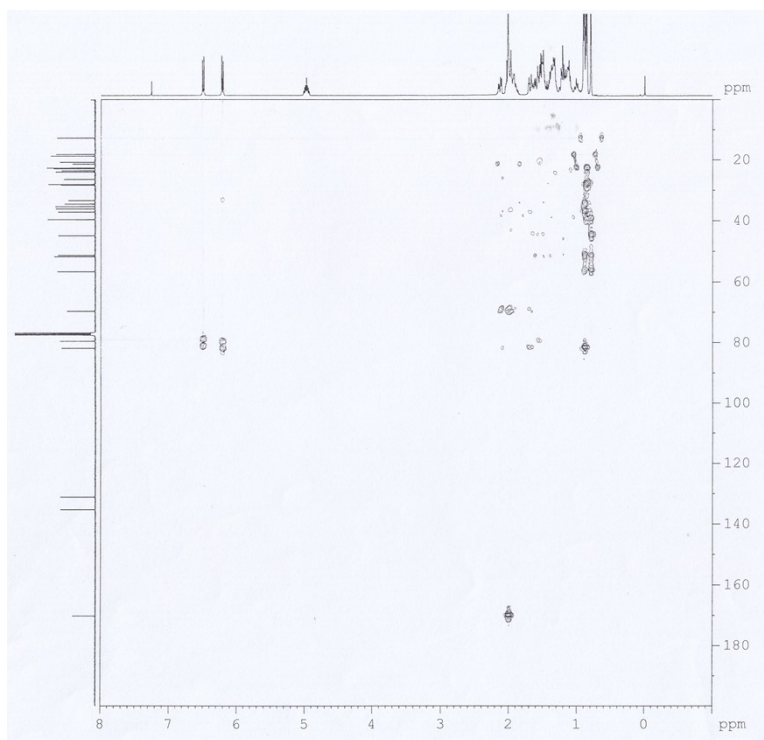

**Figure S26.** HMBC spectrum of 2'.

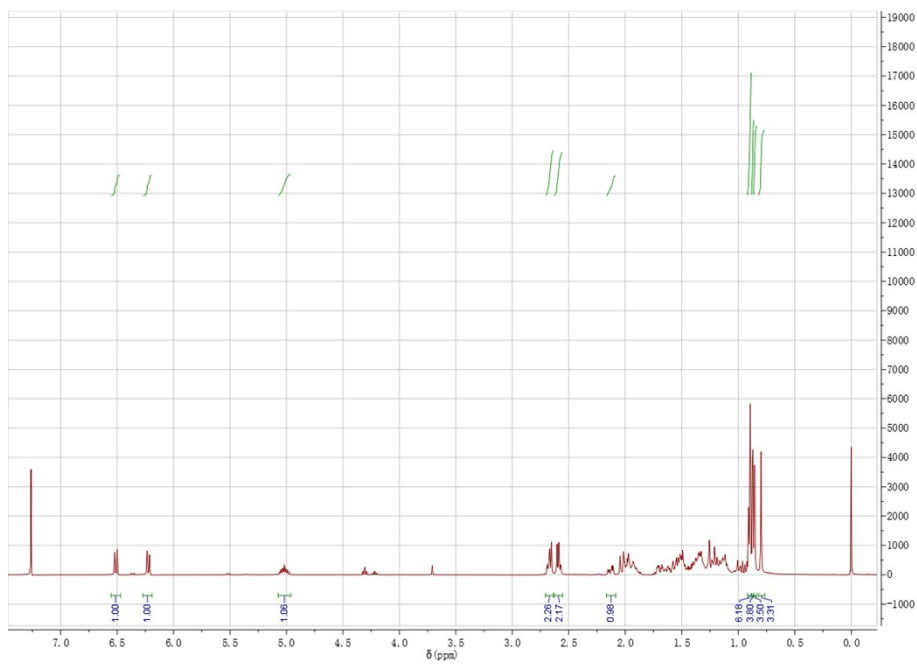

**Figure S27.**  $^1\text{H}$  NMR spectrum of **3'**.

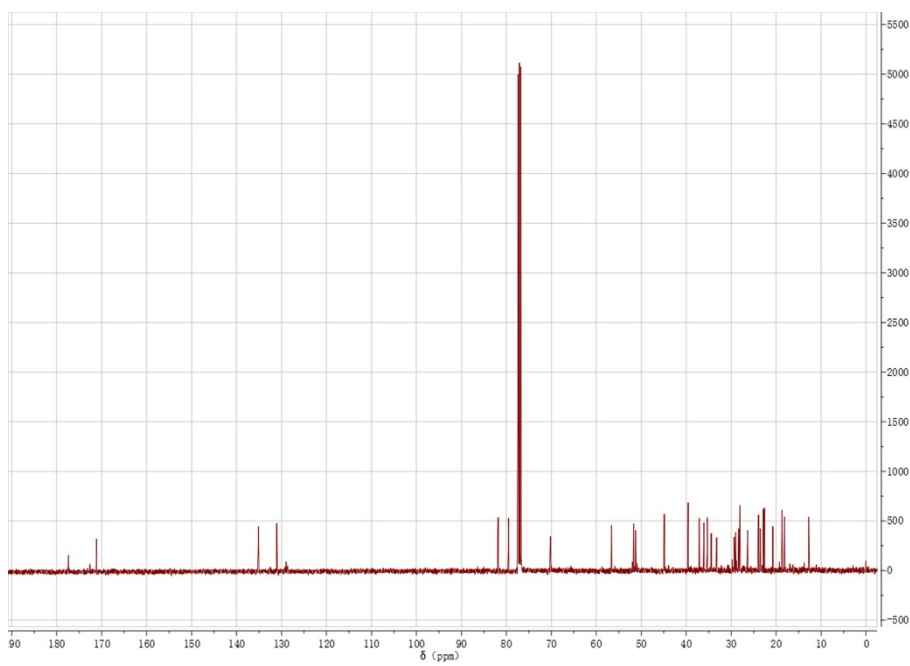

**Figure S28.**  $^{13}\text{C}$  NMR spectrum of **3'**.

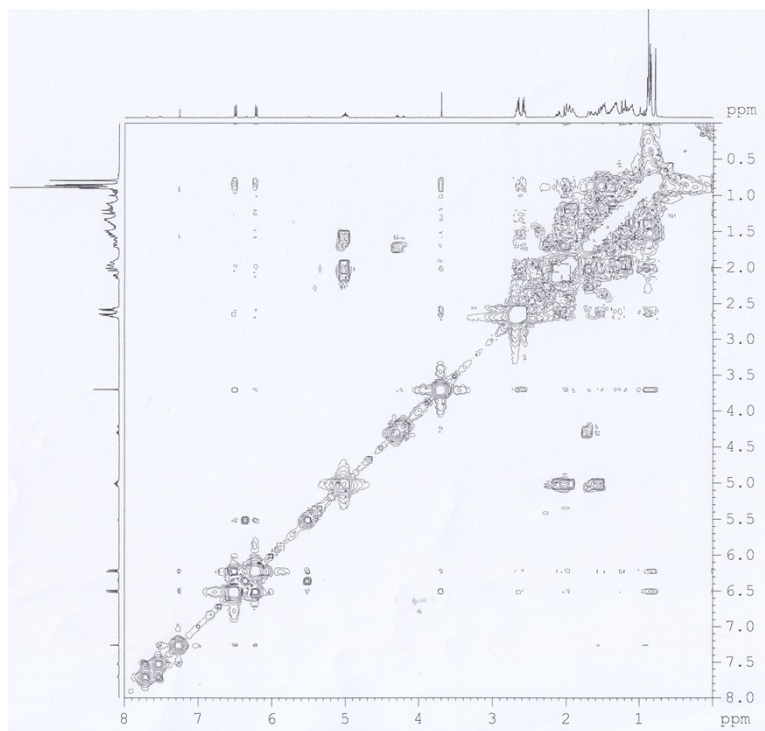

**Figure S29.** COSY spectrum of 3'.

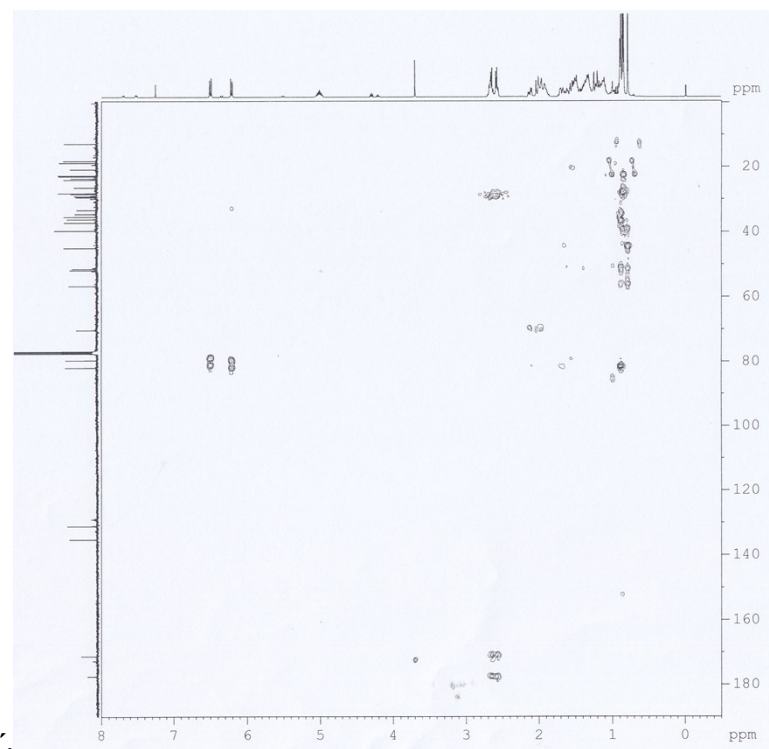

**Figure S30.** HMBC spectrum of 3'.
